# Supplementary material
Source: PubMed Central journal article supplement (PMC4246326)
Supplement: pnas.201418959SI.pdf [file pnas.201418959SI.pdf]

# Supporting Information

Rosenstein et al. 10.1073/pnas.1418959111

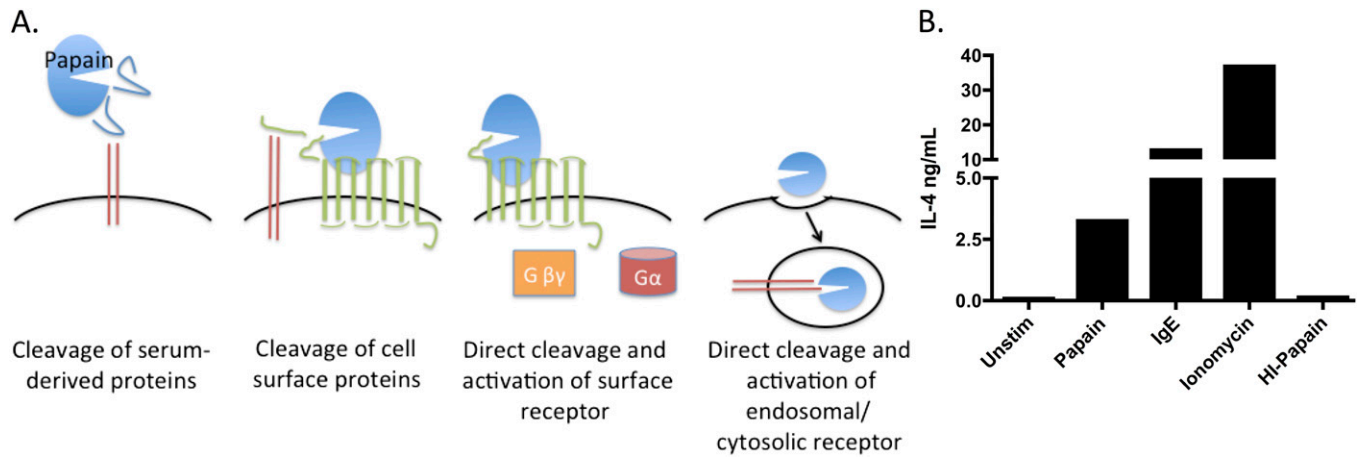

**Fig. S1.** Papain stimulation of basophils is TLR4 independent. (A) Schematic of possible mechanisms for papain stimulation of basophils. (B) IL-4 secretion by TLR4-deficient BMBs stimulated with indicated stimuli.

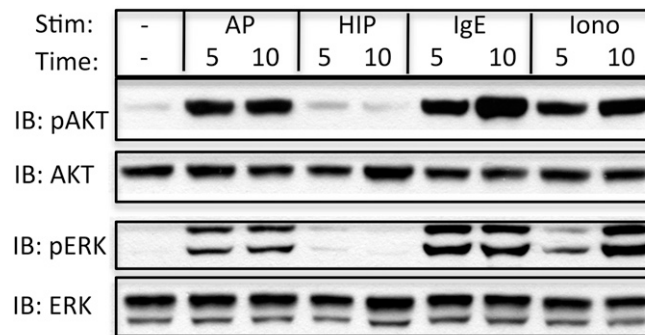

**Fig. S2.** The proteolytic activity of papain stimulates AKT and ERK activation and does not require TLR4 expression. Immunoblot analysis of pAKT/AKT and pERK/ERK prepared from TLR4-deficient BMBs stimulated as noted with active papain (AP), heat-inactivated papain (HIP), IgE cross-linking, or Ionomycin (Iono).

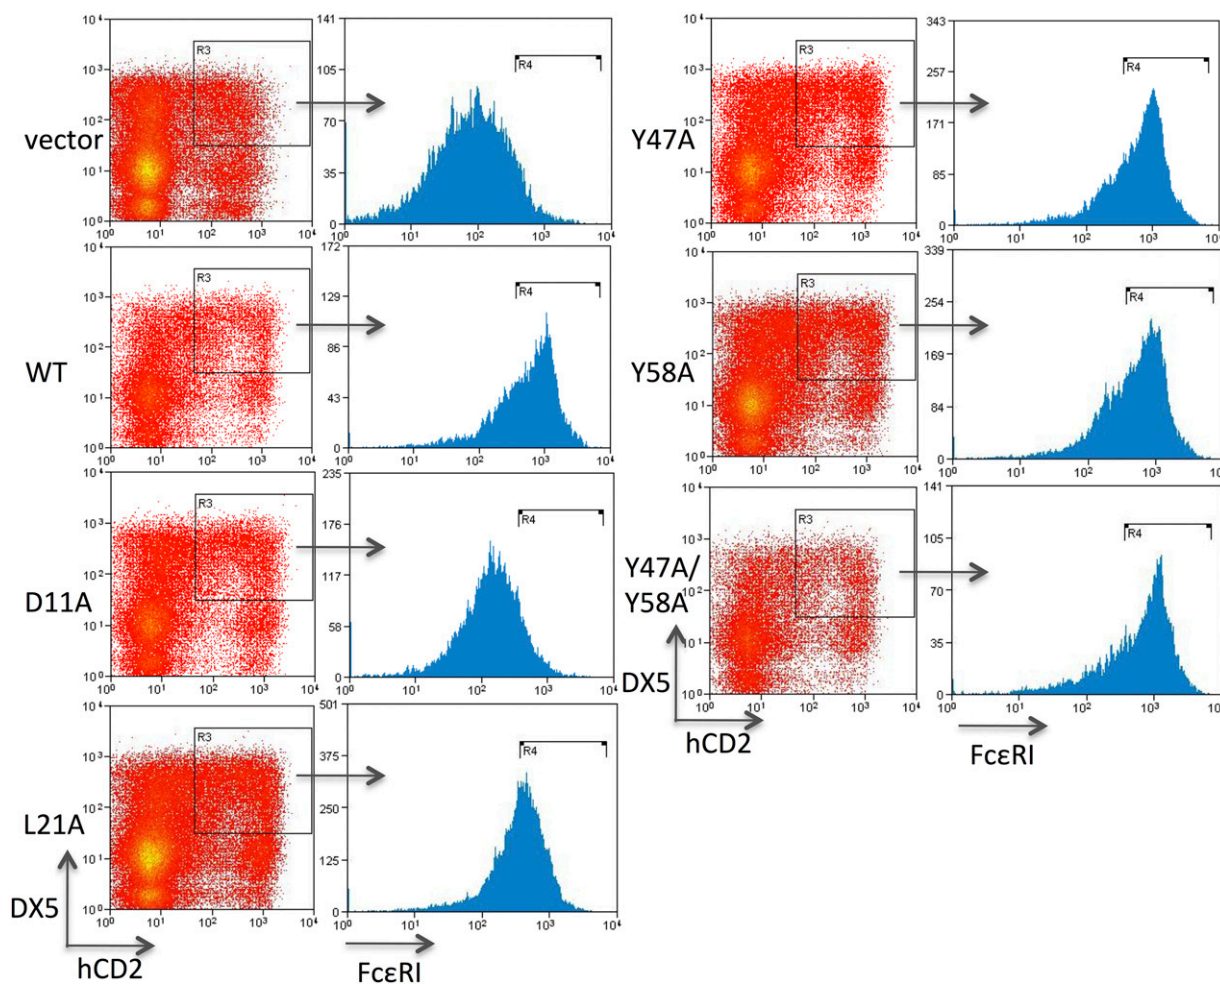

**Fig. S3.** Sorting method for transduced  $Fc\epsilon R1^{-/-}$  basophils and expression of  $Fc\epsilon R1$  on sorted population.  $Fc\epsilon R1$  expression of FACSsorted  $DX5^+ hCD2^+$  transduced  $Fc\epsilon R1^{-/-}$  basophils.

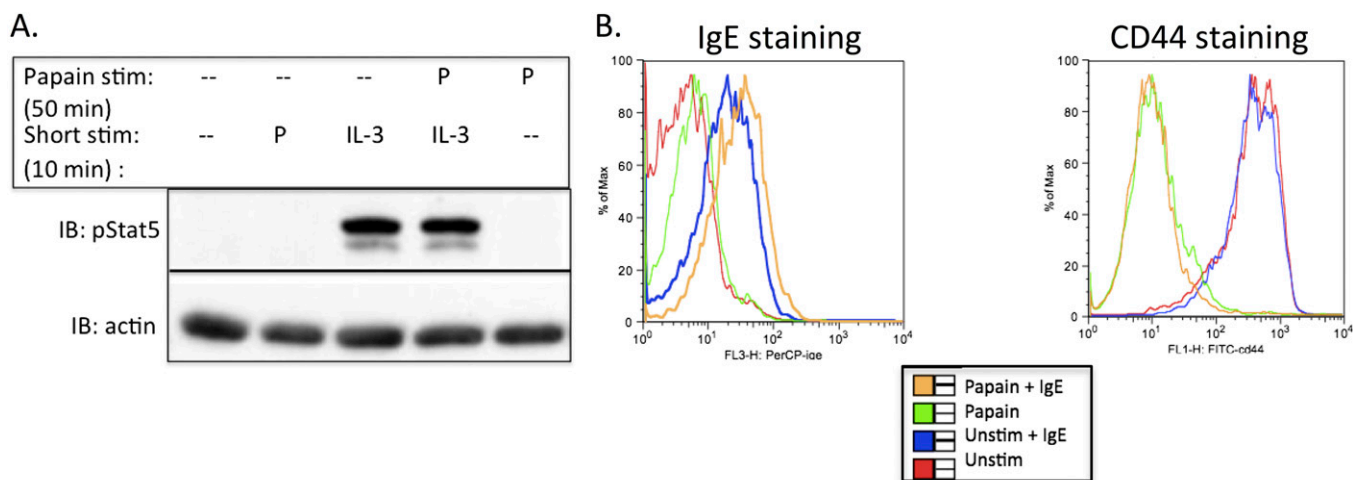

**Fig. S4.** Papain stimulation does not cleave the surface receptors for IgE or IL-3. (A) Immunoblot analysis of pStat5 and actin from BALB/c BMBs starved of IL-3 for 2 h and subsequently left unstimulated or stimulated with papain for 50 min; unstimulated and papain-stimulated samples were stimulated with IL-3 or papain or were not treated again. (B) Surface IgE and CD44 staining of BMBs treated with papain for 1 h and subsequently incubated with IgE for 20 min. CD44, a known target for papain cleavage of surface proteins, was stained as a positive control.

A.

| Knock-out mice tested <i>in vitro</i> for basophil stimulation by papain: |                           |
|---------------------------------------------------------------------------|---------------------------|
| <u>ITAM receptors</u>                                                     |                           |
| DAP12                                                                     | <u>Trp channel</u>        |
|                                                                           | Trpa1                     |
|                                                                           | Trpv1                     |
| <u>GPCR components/signaling</u>                                          |                           |
| Gai2                                                                      | <u>Adhesion Molecules</u> |
| PLC $\beta$ 2,3                                                           | CD44                      |
| PI3K $\gamma$                                                             | Ltb4r1                    |
| B-arrestin 1                                                              | F2r1                      |
| B-arrestin 2                                                              |                           |
| <u>Inflammasome components</u>                                            |                           |
| Caspase 1                                                                 | <u>TLR components</u>     |
| Asc                                                                       | TLR2/4                    |
|                                                                           | MyD88                     |
| <u>Lineage-defining molecules</u>                                         |                           |
|                                                                           | CD1d                      |
|                                                                           | Gata1                     |

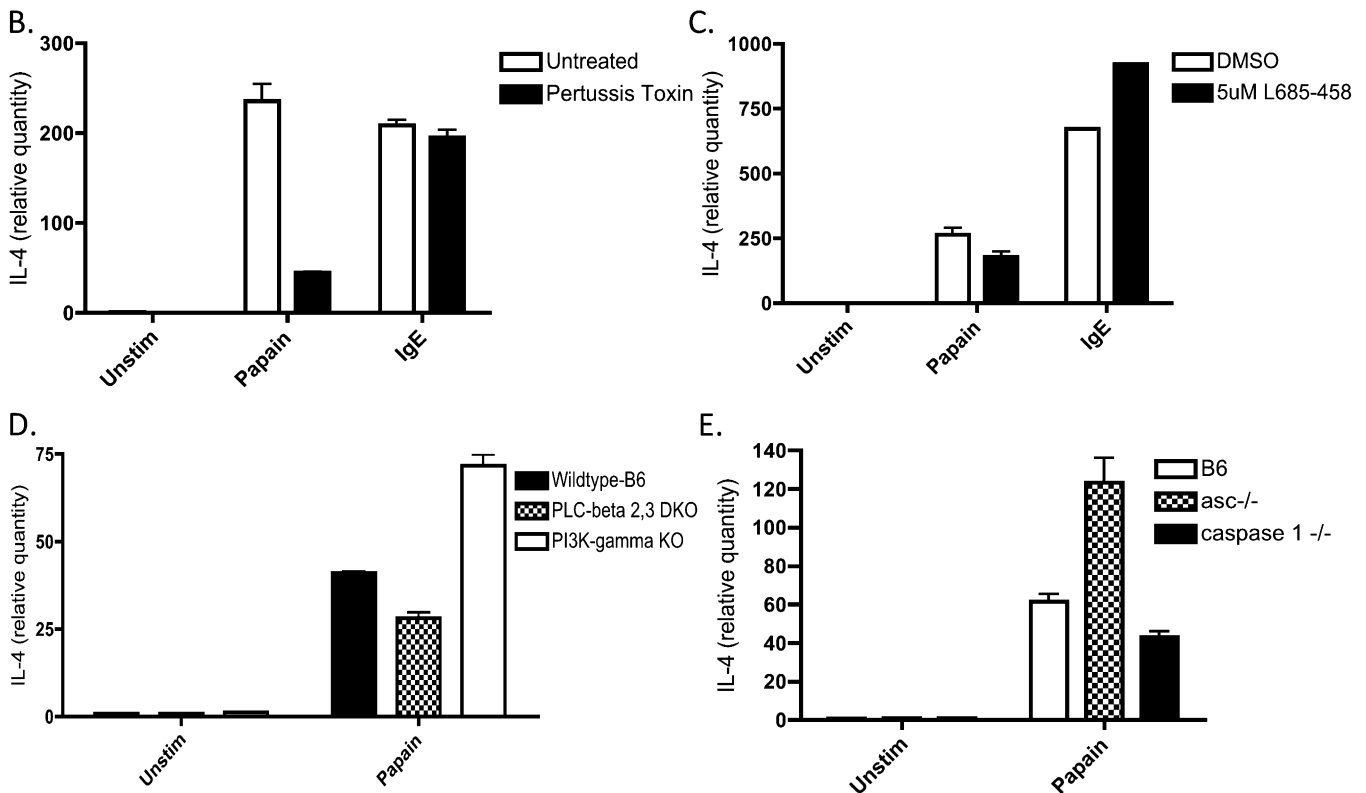

**Fig. S5.** Progress toward the identification of the sensor of papain stimulation of basophils. Papain stimulation of basophils is pertussis toxin dependent but is not dependent on the expression of PLC $\beta$ 2,3 or PI3K $\gamma$ . (A) BMBs were derived from mice deficient in indicated proteins and from control wild-type mice, and IL-4 production was evaluated by ELISA or qPCR to determine the involvement of these receptors and/or signaling mediators in basophil sensing of papain. Each knockout mouse was tested in one or two experiments. (B and C) Relative abundance of IL-4 prepared from BALB/c BMBs pretreated overnight with pertussis toxin (B) or for 24 h with L-685,458 (C) and subsequently treated with papain or IgE. RNA was isolated after 4 h of stimulation. (D and E) Relative abundance of IL-4 prepared from BMBs derived from B6, PLC $\beta$ 2,3 $^{-/-}$ , or PI3K $\gamma$  $^{-/-}$  mice (D) or B6, Asc $^{-/-}$ , or caspase-1 $^{-/-}$  mice (E) and stimulated as noted for 4 h. Stimulated samples were calibrated to the unstimulated sample of each respective strain. Error bars show SEM.
